# Supplementary material
Source: Springer Nature journal article supplement (https://www.springermedizin.de/resource/supplementary/12885_2013_4373_MOESM1_ESM.pdf/9466112)

**A Stage I and II (OS)**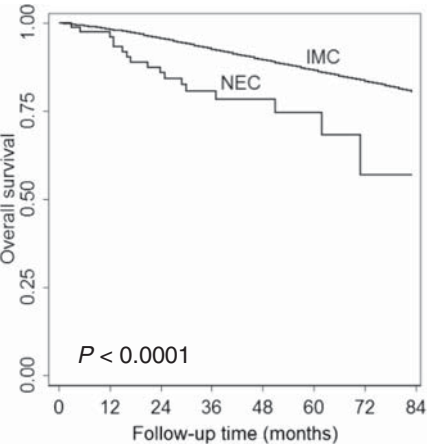**B Stage III and IV (OS)**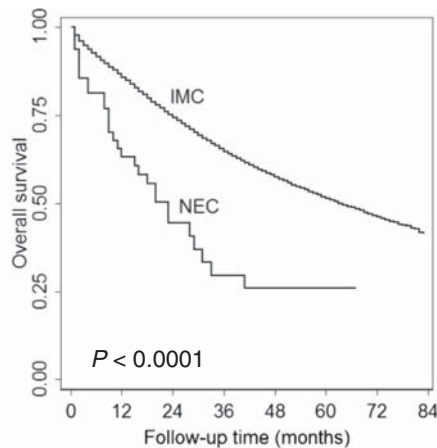**C Stage I and II (DSS)**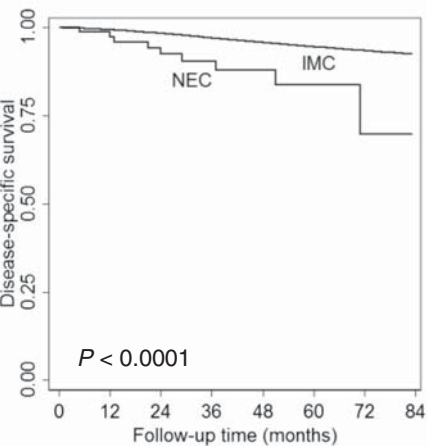**D Stage III and IV (DSS)**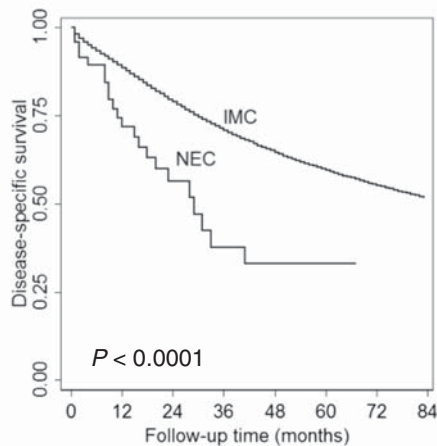

Supplement: MOESM1 [file 9466112]
